1 **Curing genetic skin disease through altered replication stress response**

2

3 Toshinari Miyauchi<sup>1</sup>, Shotaro Suzuki<sup>1</sup>, Masae Takeda<sup>1</sup>, Jin Teng Peh<sup>1</sup>, Masayuki Aiba<sup>1</sup>,

4 Ken Natsuga<sup>1</sup>, Yasuyuki Fujita<sup>1</sup>, Takuya Takeichi<sup>2</sup>, Taiko Sakamoto<sup>3</sup>, Masashi

5 Akiyama<sup>2</sup>, Hiroshi Shimizu<sup>1</sup> & Toshifumi Nomura<sup>1\*</sup>

6

7 <sup>1</sup> Department of Dermatology, Faculty of Medicine and Graduate School of Medicine,

8 Hokkaido University, Sapporo, Japan

9 <sup>2</sup> Department of Dermatology, Nagoya University Graduate School of Medicine,

10 Nagoya, Japan

11 <sup>3</sup> Sakamoto Clinic, Fujieda, Japan

12

13 **\*Correspondence:** Toshifumi Nomura, MD, PhD

14 Department of Dermatology, Faculty of Medicine and Graduate School of Medicine,

15 Hokkaido University

16 North 15 West 7, Kita-ku, Sapporo 060-8638, Japan

17 Tel: +81-117067387

18 Fax: +81-117067820

19 E-mail: [nomura@huhp.hokudai.ac.jp](mailto:nomura@huhp.hokudai.ac.jp)

20

21 **Competing Interests Declaration**

22 The authors declare no competing interests.

23

24

25 **Summary**

26 **Revertant mosaicism, or ‘natural gene therapy’, refers to the spontaneous *in vivo***  
27 **reversion of an inherited mutation in a somatic cell<sup>1</sup>. Only ~50 human genetic**  
28 **disorders exhibit revertant mosaicism, implicating a distinctive role played by**  
29 **mutant proteins in somatic correction of a pathogenic germline mutation<sup>2</sup>.**  
30 **However, the process by which mutant proteins induce somatic genetic reversion**  
31 **in these diseases remains unknown. Here we show that heterozygous pathogenic**  
32 ***CARD14* mutations causing autoinflammatory skin diseases, including psoriasis**  
33 **and pityriasis rubra pilaris, are repaired mainly via homologous recombination.**  
34 **Rather than altering the DNA damage response to exogenous stimuli such as X-**  
35 **irradiation or etoposide treatment, mutant *CARD14* increased DNA double-strand**  
36 **breaks under conditions of replication stress. Furthermore, mutant *CARD14***  
37 **suppressed new origin firings without promoting crossover events in the**  
38 **replication stress state. Together, these results suggest that mutant *CARD14* alters**  
39 **the replication stress response and preferentially drives break-induced replication**  
40 **(BIR), which is generally suppressed in eukaryotes<sup>3</sup>. Our results highlight the**  
41 **involvement of BIR in reversion events, thus revealing a previously undescribed**  
42 **role of BIR that could potentially be exploited to develop therapeutics for**  
43 **currently intractable genetic diseases.**

44

45 Eukaryotic genomes are inevitably challenged by extrinsic and intrinsic stresses that  
46 threaten genome integrity. DNA double-strand breaks (DSBs) are the most toxic and  
47 mutagenic of DNA lesions<sup>4-6</sup>, arising both exogenously as a consequence of exposure to  
48 ionising radiation (IR) and certain chemicals, and endogenously as a result of  
49 replication stress or reactive oxygen species. Homologous recombination (HR) is a  
50 crucial pathway involved in DSB repair and replication stress response (RSR)<sup>7-9</sup>. HR is  
51 generally regarded as a genetically silent event in mitotic cells because it preferentially  
52 occurs between sister chromatids following chromosomal replication. However, if HR  
53 occurs via a homologous chromosome, it can lead to loss of heterozygosity (LOH),  
54 which contributes to cancer initiation and progression<sup>10</sup>, tissue remodelling<sup>11,12</sup> and,  
55 notably, somatic genetic rescue events (referred to as ‘revertant mosaicism [RM]’) in  
56 Mendelian diseases<sup>13</sup>. In particular, in some genetic skin diseases, each patient develops  
57 dozens to thousands of revertant skin patches where a heterozygous pathogenic  
58 germline mutation is reverted via LOH<sup>14-18</sup>, suggesting that HR may be enhanced in  
59 mutant keratinocytes, the major cells of the epidermis. Manipulating HR to induce the  
60 reversion of disease-causing mutations may potentially benefit patients with various  
61 genetic diseases for which only symptomatic treatment is currently available. However,  
62 the process by which mutant proteins induce increased rates of HR in these diseases  
63 remains unknown.

64 Caspase recruitment domain-containing protein 14 (CARD14) is a scaffold molecule  
65 predominantly expressed in keratinocytes. Heterozygous gain-of-function mutations in  
66 *CARD14* lead to CARD14-associated papulosquamous eruption (CAPE), a disease  
67 spectrum that includes psoriasis and pityriasis rubra pilaris<sup>19</sup>. Mutant CARD14 (mut-  
68 CARD14) triggers the activation of nuclear factor (NF)- $\kappa$ B signalling<sup>20</sup> with the

69 subsequent disruption of skin homeostasis, inflammation, and hyperproliferation of  
70 keratinocytes, which are the canonical pathways implicated in psoriasis<sup>21</sup>.

71 Here, we present an initial evidence indicating HR-induced RM in CAPE. We aimed  
72 to elucidate the molecular mechanisms underlying this self-healing phenomenon by  
73 analysing the impact of mut-CARD14 on DNA damage and replication stress, as well as  
74 the response to these events. We identified that mut-CARD14 may play an important  
75 role in genetic reversion by enhancing BIR under replication stress.

76

## 77 **Results**

### 78 **Identification of RM in CAPE**

79 We analysed 2 unrelated Japanese patients with CAPE presenting with erythroderma  
80 (generalised red skin) since birth. Case 1, a 60-year-old man, and Case 2, a 27-year-old  
81 woman<sup>22</sup>, were heterozygous for c.356T>C (p.M119T) and c.407A>T (p.Q136L) in  
82 *CARD14*, respectively (Fig. S1a-f). We noted numerous disseminated normal-appearing  
83 skin areas in Case 1 and several clinically unaffected spots on the left leg of Case 2  
84 (Fig. 1a and Fig. S1g-k). A skin biopsy revealed that these spots were histologically  
85 normalised (Fig. 1b and Fig. S1l-n). Notably, the mutations reverted to wild-type in the  
86 epidermis of all examined spots (6 of 6) but not in the dermis (Fig. 1c and Fig. S2a). To  
87 address the mechanisms underlying this reversion, we performed a whole-genome  
88 oligo-single nucleotide polymorphism (SNP) array analysis using genomic DNA from  
89 each epidermis. Notably, copy-neutral LOH (cn-LOH), extending from breakpoints  
90 proximal to *CARD14*, to the telomere on chromosome 17q, were identified in 4 of 6  
91 revertant spots (Fig. 1d and Fig. S2b, c). Varying initiation sites of cn-LOH excluded  
92 the possibility of simple genetic mosaicism. Notably, 1 of 3 revertant spots in Case 1



93 showed a different cn-LOH on chromosome 9q (Fig. S2d). Furthermore, Case 1 had  
94 developed multiple skin tumours<sup>23,24</sup>, including squamous cell carcinomas (SCCs)  
95 which harbour chromosomal aberrations, such as LOH and trisomy (Fig. S2e, f).  
96 Because HR events that are generally rare in most genetic skin diseases were frequently  
97 observed in these CAPE patients, we inferred that mut-CARD14 may induce an  
98 increase in the rate of HR, which potentially leads to RM and carcinogenesis (Fig. S1o).

99

#### 100 **No direct effect of mutant CARD14 on DDR**

101 To examine the effects of mut-CARD14 on HR, we generated U2OS cell lines which  
102 express FLAG-tagged wild-type (wt-), or mut-CARD14, only when doxycycline (Dox)  
103 is present (Fig. 2a, b and Fig. S3a-c). To determine whether mut-CARD14 directly  
104 increases DSBs, the levels of phosphorylated histone H2AX ( $\gamma$ H2AX), a major marker  
105 of large chromatin domains surrounding DSBs, were quantified in these cell lines.  
106 However, no significant increase in  $\gamma$ H2AX levels was detected in any of the cell lines  
107 following Dox stimulation (Fig. 2c). To address whether mut-CARD14 alters DNA  
108 damage response (DDR) to exogenous DSBs, we monitored  $\gamma$ H2AX levels as well as  
109 the phosphorylation levels of 53BP1 and RPA2, markers for non-homologous end  
110 joining and HR, respectively<sup>25-27</sup>, after exposing the cell lines to IR or etoposide. Mut-  
111 CARD14 did not enhance HR in the repair of exogenous DSBs (Fig. S4a-d). To further  
112 examine whether mut-CARD14 increases HR in DDR, we performed an enhanced  
113 green fluorescent protein (EGFP)-based reporter assay in which a DSB induced by the  
114 endonuclease I-SceI followed by HR leads to generation of EGFP-positive cells (Fig.  
115 S5a)<sup>28</sup>. Again, neither wt-CARD14 nor mut-CARD14 caused a significant increase in

116 HR frequency (Fig. S5b-f). These findings suggest that mut-CARD14 does not  
117 preferentially increase either DNA damage or HR frequency in the DSB repair pathway.

118

### 119 **Mutant CARD14 alters RSR**

120 Replication stress, especially following prolonged stalling, may cause DNA replication  
121 fork collapse, leading to DSBs<sup>6</sup>. HR promotes the restart of stress-induced stalled and  
122 collapsed replication forks<sup>8</sup>. Therefore, we next sought to address whether mut-  
123 CARD14 causes replication stress and alters RSR. To this end, we first performed a  
124 fluorescence-activated cell sorting (FACS)-based cell cycle analysis using the U2OS  
125 cell lines. However, mut-CARD14 did not alter cell cycle distribution (Fig. S6a, b).  
126 This was further confirmed via DNA fibre analysis, in which mut-CARD14 neither  
127 affected fork speed nor increased stalled fork frequency (Fig. S6c-g). Thus, mut-  
128 CARD14 did not result in replication stress per se.

129 To address whether mut-CARD14 increases DSBs under conditions of replication  
130 stress, we treated the cell lines with hydroxyurea (HU) and monitored  $\gamma$ H2AX levels up  
131 to 48 h after treatment. Notably, mut-CARD14 cell lines with Dox showed higher levels  
132 of  $\gamma$ H2AX than those without Dox at 36 h and 48 h, whereas wt-CARD14 cell lines  
133 showed no difference at all time points (Fig. 2d). We performed the same analysis using  
134 aphidicolin (APH), which also caused similar differences in  $\gamma$ H2AX levels based on  
135 mut-CARD14 expression (Fig. S6h). In both analyses, no obvious difference in  $\gamma$ H2AX  
136 levels was detected 24 h following treatment with HU or APH. Collectively, these  
137 results suggest that mut-CARD14 expression leads to fork instability following  
138 prolonged replication fork stalling but does not increase DSBs following short-term  
139 fork stalling.

140 We next sought to clarify whether mut-CARD14-induced stalled fork instability is  
141 mediated by the NF- $\kappa$ B pathway, which is activated by mut-CARD14<sup>20</sup> (Fig. S6i).  
142 Therefore, we examined  $\gamma$ H2AX levels in HU-treated cell lines with or without an  
143 inhibitor of  $\kappa$ B (I $\kappa$ B) overexpression which suppresses NF- $\kappa$ B activation (Fig. S6j).  
144 Notably, I $\kappa$ B $\alpha$  overexpression partially reduced  $\gamma$ H2AX levels in the cells expressing  
145 mut-CARD14 (Fig. 2e). Mut-CARD14-induced alteration of the RSR is partially  
146 explained by activation of the NF- $\kappa$ B signalling pathway.

147

#### 148 **HR activation by mutant CARD14**

149 Having confirmed that mut-CARD14 expression decreases fork stability under  
150 prolonged replication stress, we investigated whether HR-related factors are activated  
151 under those circumstances. We approached this issue using a FACS-based method to  
152 quantify the activities of HR-related factors at the single cell level<sup>29,30</sup>. For these  
153 analyses, the mean values of signal intensities obtained from HU-treated and Dox-  
154 absent samples were set to threshold levels and the percentages of cells showing  
155 intensities above these levels ( $\gamma$ H2AX<sup>hi</sup> cells) were compared among samples (Fig. 3a, b  
156 and Fig. S7a). Notably, consistent with immunoblotting data, mut-CARD14 cell lines  
157 treated with Dox and either HU or APH for 36 h, showed a significant increase in the  
158 percentage of  $\gamma$ H2AX<sup>hi</sup> cells to the total cells, compared to those without Dox, whereas  
159 wt-CARD14 showed no increase (Fig. 3c and Fig. S7b-d). Similarly, under prolonged  
160 replication stress, mut-CARD14 expression significantly increased the ratio of highly  
161 phosphorylated RPA2 cells (p-RPA2<sup>hi</sup> cells) (Fig. 3d). Furthermore, co-staining with  
162  $\gamma$ H2AX and p-RPA2 revealed that mut-CARD14 expression increased the proportion of  
163 double-positive cells ( $\gamma$ H2AX<sup>hi</sup>p-RPA2<sup>hi</sup> cells) (Fig. 3b, e). Similarly, we identified that

164 mut-CARD14 also activated BRCA1, which is important for HR and fork restart<sup>31</sup>,  
165 yielding a higher proportion of  $\gamma$ H2AX<sup>hip</sup>-BRCA1<sup>hi</sup> cells (Fig. 3f, g). We also examined  
166 whether the ATR-CHK1 pathway, which stabilises replication forks and promotes  
167 several types of fork restarts including a HR-mediated fork restart in RSR<sup>32</sup>, is activated  
168 by mut-CARD14 under prolonged fork stalling. Mut-CARD14 significantly increased  
169 the proportion of  $\gamma$ H2AX<sup>hip</sup>-CHK1<sup>hi</sup> cells as well as p-CHK1<sup>hi</sup> cells (Fig. 3h, i).  
170 Collectively, these results suggest that in mut-CARD14-expressing cells, collapsed  
171 forks caused by prolonged stalling were repaired by the HR-mediated pathway via  
172 activation of the ATR-CHK1 signalling pathway.

173

#### 174 **Mutant CARD14 promotes BIR in RSR**

175 HR-mediated repair of stalled or collapsed forks may take place via 3 pathways:  
176 synthesis-dependent strand annealing (SDSA), double Holliday junction (dHJ), and  
177 BIR<sup>3,9</sup> (Fig. S8a). BIR is initiated when only one broken end is available for strand  
178 invasion, whereas SDSA and dHJ require two DSB ends. Thus, dormant origin firing is  
179 essential for rescuing collapsed forks using these two pathways<sup>3</sup>. We sought to  
180 determine which pathway played a dominant role in replication fork repair under mut-  
181 CARD14 expression. To this end, we first performed quantitative PCR (qPCR) analysis  
182 of replication-related genes. The expression levels of genes associated with replication  
183 origin firing, such as *ORC1*, *MCM10*, *GINS1*, and *GINS2*, were decreased in mut-  
184 CARD14-expressing cells following extended HU treatment, but not in wt-CARD14-  
185 expressing cells (Fig. S9a-h). To further confirm whether mut-CARD14 suppresses new  
186 origin firing after prolonged fork stalling, we analysed replication fork dynamics via  
187 DNA fibre assay with prolonged HU treatment. The frequency of new origin firing was

188 reduced by mut-CARD14 expression but not by wt-CARD14, while neither wt- nor  
189 mut-CARD14 altered the frequency of stalled or ongoing replication forks (Fig. 4a-d).  
190 As these findings suggested that mut-CARD14 expression, together with HU, inhibits  
191 dormant origin firings near collapsed forks, resulting in a situation where only one  
192 broken end is available for DSB repair, we concluded that mut-CARD14 promotes BIR  
193 in stalled or collapsed fork repair under conditions of replication stress (Fig. S8b).  
194 Notably, HR-mediated revertant epidermis samples as well as SCC samples, obtained  
195 from the studied CAPE patients, all possessed long-tract LOH extending from  
196 recombination sites to the telomere (Fig. 1d and Fig. S2b, d-f). Although this specific  
197 form of LOH arises only via BIR or dHJ with crossover resolution (Fig. S8c), other  
198 possible consequences of dHJ, such as gene conversion, were not detected in any of the  
199 samples. Furthermore, the frequency of sister chromatid exchanges (SCEs)<sup>33</sup>, which  
200 represents the crossover events, following HU treatment was somewhat decreased in  
201 mut-CARD14-expressing cells, but not in those expressing wt-CARD14 (Fig. 4e-g),  
202 suggesting that dHJ with crossover does not mainly occur in this context. Considering  
203 the results together, we deduced that mut-CARD14 plays a role in the reversion of a  
204 disease-causing mutation in patients with CAPE, by enhancing BIR under conditions of  
205 replication stress (Fig. 4h).

206

## 207 **Discussion**

208 The current study revealed, for the first time, that RM occurs in CAPE. We  
209 demonstrated that HR is the major mechanism responsible for the reversion of *CARD14*  
210 mutations and that mut-CARD14 preferentially drives BIR under conditions of  
211 replication stress. However, BIR is generally regarded as a rare event which is

212 suppressed by MUS81 endonuclease in normal cells, as well as converging forks  
213 arriving from the opposite direction, as it elevates the risk of mutagenesis and  
214 chromosomal abnormalities<sup>34</sup>. Notably, recent studies have uncovered a series of  
215 unusual BIR-promoting circumstances as follows<sup>3,35-40</sup>: (i) generation of DNA nicks in  
216 genomic regions lacking replication origins within a MUS81-null background, (ii)  
217 repair of massive replication fork collapse under conditions of replication stress (e.g.,  
218 overexpression of oncogenes, deregulation of origin licensing, inverted DNA repeats,  
219 trinucleotide repeats, and R-loops), and (iii) alternative lengthening of telomeres in the  
220 absence of telomerase. Our findings suggest that mut-CARD14 promotes replication  
221 fork collapse and suppresses dormant origin firing in the replication stress state. These  
222 effects of mut-CARD14 collectively promote BIR that may continue for hundreds of  
223 kilobases, resulting in long-tract LOH that extends to the telomere. Therefore, to our  
224 knowledge, this study is the first to provide evidence indicating the potential  
225 contribution of BIR to RM. Notably, similar long-tract LOH has also been frequently  
226 observed in other skin diseases such as ichthyosis with confetti and loricrin keratoderma  
227 where dozens to thousands of HR-driven revertant skin spots arise in each patient<sup>14-18</sup>.  
228 Further investigations centred on RM may help elucidate hitherto unknown or unvalued  
229 mechanisms that regulate the BIR pathway.

230 This study also suggests that skin inflammation such as that induced by mut-CARD14  
231 may promote BIR. Recent studies on patients with ulcerative colitis have revealed that  
232 human intestinal stem cells exposed to long-standing inflammation adapt to such  
233 inflammation by acquiring genetic and genomic alterations including LOH, associated  
234 with the downregulation of IL-17 signalling<sup>11,12</sup>. Furthermore, long-tract LOH is  
235 frequently seen in skin lesions of porokeratosis, a common autoinflammatory

236 keratinisation disease<sup>41</sup>. Interestingly, previous studies have shown that it is replication  
237 stress, and not I-SceI-induced DSB, which activates the NF- $\kappa$ B signalling pathway,  
238 which, in turn, induces HR<sup>42</sup>. The current study indicated that mut-CARD14 does not  
239 promote HR when DSBs are exogenously introduced via I-SceI but drives BIR under  
240 conditions of replication stress. These findings suggest that inflammation resulting from  
241 NF- $\kappa$ B activation under conditions of replication stress may induce BIR. Further studies  
242 are warranted to address the involvement of inflammation in BIR initiation.

243 In conclusion, this study demonstrated that RM occurs in CAPE and implicates the  
244 involvement of BIR in reversion events. Fully elucidating the molecular mechanisms  
245 underlying natural gene therapy may deepen the understanding of DDR or RSR and  
246 pave the way to develop innovative therapies for genetic diseases, for which therapeutic  
247 options are currently limited, by manipulating HR to repair disease-causing mutations.

248

249 **References**

- 250 1. Jonkman, M. F. & Pasmooij, A. M. G. Revertant Mosaicism — Patchwork in  
251 the Skin. *N. Engl. J. Med.* **360**, 1680–1682 (2009).
- 252 2. Nomura, T. Recombination-induced revertant mosaicism in ichthyosis with  
253 confetti and loricrin keratoderma. *J. Dermatol. Sci.* **97**, 94–100 (2020).
- 254 3. Kramara, J., Osia, B. & Malkova, A. Break-Induced Replication: The Where,  
255 The Why, and The How. *Trends Genet.* **34**, 518–531 (2018).
- 256 4. Khanna, K. K. & Jackson, S. P. DNA double-strand breaks: signaling, repair  
257 and the cancer connection. *Nat. Genet.* **27**, 247–254 (2001).
- 258 5. Mazouzi, A., Velimezi, G. & Loizou, J. I. DNA replication stress: causes,  
259 resolution and disease. *Exp. Cell Res.* **329**, 85–93 (2014).
- 260 6. Zeman, M. K. & Cimprich, K. A. Causes and consequences of replication  
261 stress. *Nat. Cell Biol.* **16**, 2–9 (2014).
- 262 7. Petermann, E., Orta, M. L., Issaeva, N., Schultz, N. & Helleday, T.  
263 Hydroxyurea-stalled replication forks become progressively inactivated and  
264 require two different RAD51-mediated pathways for restart and repair. *Mol.*  
265 *Cell* **37**, 492–502 (2010).
- 266 8. Petermann, E. & Helleday, T. Pathways of mammalian replication fork  
267 restart. *Nat. Rev. Mol. Cell Biol.* **11**, 683–687 (2010).
- 268 9. Jasin, M. & Rothstein, R. Repair of Strand Breaks by Homologous  
269 Recombination. *Cold Spring Harb. Perspect. Biol.* **5**, a012740 (2013).
- 270 10. Deng, G., Lu, Y., Zlotnikov, G., Thor, A. D. & Smith, H. S. Loss of  
271 Heterozygosity in Normal Tissue Adjacent to Breast Carcinomas. *Science*  
272 **274**, 2057–2059 (1996).



- 273 11. Kakiuchi, N. *et al.* Frequent mutations that converge on the NFKBIZ  
274 pathway in ulcerative colitis. *Nature* **577**, 260–265 (2020).
- 275 12. Nanki, K. *et al.* Somatic inflammatory gene mutations in human ulcerative  
276 colitis epithelium. *Nature* **577**, 254–259 (2020).
- 277 13. Revy, P., Kannengiesser, C. & Fischer, A. Somatic genetic rescue in  
278 Mendelian haematopoietic diseases. *Nat. Rev. Genet.* **20**, 582–598 (2019).
- 279 14. Choate, K. A. *et al.* Mitotic Recombination in Patients with Ichthyosis  
280 Causes Reversion of Dominant Mutations in KRT10. *Science* **330**, 94–97  
281 (2010).
- 282 15. Choate, K. A. *et al.* Frequent somatic reversion of KRT1 mutations in  
283 ichthyosis with confetti. *J. Clin. Invest.* **125**, 1703–1707 (2015).
- 284 16. Suzuki, S. *et al.* Revertant Mosaicism in Ichthyosis with Confetti Caused by a  
285 Frameshift Mutation in KRT1. *J. Invest. Dermatol.* **136**, 2093–2095 (2016).
- 286 17. Nomura, T. *et al.* Chromosomal inversions as a hidden disease-modifying  
287 factor for somatic recombination phenotypes. *JCI Insight* **3**, e97595 (2018).
- 288 18. Suzuki, S. *et al.* Somatic recombination underlies frequent revertant  
289 mosaicism in lorincrin keratoderma. *Life Sci. Alliance* **2**, e201800284 (2019).
- 290 19. Craiglow, B. G. *et al.* CARD14-associated papulosquamous eruption: A  
291 spectrum including features of psoriasis and pityriasis rubra pilaris. *J. Am.*  
292 *Acad. Dermatol.* **79**, 487–494 (2018).
- 293 20. Howes, A. *et al.* Psoriasis mutations disrupt CARD14 autoinhibition  
294 promoting BCL10-MALT1-dependent NF- $\kappa$ B activation. *Biochem. J.* **473**,  
295 1759–1768 (2016).

- 296 21. Dainichi, T. *et al.* The epithelial immune microenvironment (EIME) in atopic  
297 dermatitis and psoriasis. *Nat. Immunol.* **19**, 1286–1298 (2018).
- 298 22. Takeichi, T. *et al.* Pityriasis Rubra Pilaris Type V as an Autoinflammatory  
299 Disease by CARD14 Mutations. *JAMA Dermatol.* **153**, 66–70 (2017).
- 300 23. Arita, K. *et al.* Squamous cell carcinoma in a patient with non-bullous  
301 congenital ichthyosiform erythroderma. *Br. J. Dermatol.* **148**, 367–369  
302 (2003).
- 303 24. Natsuga, K. *et al.* Novel ABCA12 mutations identified in two cases of non-  
304 bullous congenital ichthyosiform erythroderma associated with multiple skin  
305 malignant neoplasia. *J. Invest. Dermatol.* **127**, 2669–2673 (2007).
- 306 25. Symington, L. S. & Gautier, J. Double-strand break end resection and repair  
307 pathway choice. *Annu. Rev. Genet.* **45**, 247–271 (2011).
- 308 26. Panier, S. & Boulton, S. J. Double-strand break repair: 53BP1 comes into  
309 focus. *Nat. Rev. Mol. Cell Biol.* **15**, 7–18 (2014).
- 310 27. Byrne, B. M. & Oakley, G. G. Replication protein A, the laxative that keeps  
311 DNA regular: The importance of RPA phosphorylation in maintaining  
312 genome stability. *Semin. Cell Dev. Biol.* **86**, 112–120 (2019).
- 313 28. Pierce, A. J., Johnson, R. D., Thompson, L. H. & Jasin, M. XRCC3 promotes  
314 homology-directed repair of DNA damage in mammalian cells. *Genes Dev.*  
315 **13**, 2633–2638 (1999).
- 316 29. Shibata, A. *et al.* DNA double-strand break repair pathway choice is directed  
317 by distinct MRE11 nuclease activities. *Mol. Cell* **53**, 7–18 (2014).

- 318 30. Forment, J. V. & Jackson, S. P. A flow cytometry-based method to simplify  
319 the analysis and quantification of protein association to chromatin in  
320 mammalian cells. *Nat. Protoc.* **10**, 1297–1307 (2015).
- 321 31. Xu, Y. *et al.* 53BP1 and BRCA1 control pathway choice for stalled  
322 replication restart. *Elife* **6**, 1–24 (2017).
- 323 32. Saldivar, J. C., Cortez, D. & Cimprich, K. A. The essential kinase ATR:  
324 ensuring faithful duplication of a challenging genome. *Nat. Rev. Mol. Cell*  
325 *Biol.* **18**, 622–636 (2017).
- 326 33. Wilson, D. M. & Thompson, L. H. Molecular mechanisms of sister-  
327 chromatid exchange. *Mutat. Res.* **616**, 11–23 (2007).
- 328 34. Mayle, R. *et al.* Mus81 and converging forks limit the mutagenicity of  
329 replication fork breakage. *Science* **349**, 742–747 (2015).
- 330 35. Lydeard, J. R., Jain, S., Yamaguchi, M. & Haber, J. E. Break-induced  
331 replication and telomerase-independent telomere maintenance require Pol32.  
332 *Nature* **448**, 820–823 (2007).
- 333 36. Anand, R. P., Lovett, S. T. & Haber, J. E. Break-Induced DNA Replication.  
334 *Cold Spring Harb. Perspect. Biol.* **5**, a010397 (2013).
- 335 37. Kramara, J., Osia, B. & Malkova, A. Break-induced replication: an unhealthy  
336 choice for stress relief? *Nat. Struct. Mol. Biol.* **24**, 11–12 (2017).
- 337 38. Sakofsky, C. J. & Malkova, A. Break induced replication in eukaryotes:  
338 mechanisms, functions, and consequences. *Crit. Rev. Biochem. Mol. Biol.* **52**,  
339 395–413 (2017).

- 340 39. Kim, J. C., Harris, S. T., Dinter, T., Shah, K. A. & Mirkin, S. M. The role of  
341 break-induced replication in large-scale expansions of (CAG)<sub>n</sub>/(CTG)<sub>n</sub>  
342 repeats. *Nat. Struct. Mol. Biol.* **24**, 55–60 (2017).
- 343 40. Macheret, M. & Halazonetis, T. D. Intragenic origins due to short G1 phases  
344 underlie oncogene-induced DNA replication stress. *Nature* **555**, 112–116  
345 (2018).
- 346 41. Kubo, A. *et al.* Clonal Expansion of Second-Hit Cells with Somatic  
347 Recombinations or C>T Transitions Form Porokeratosis in MVD or MVK  
348 Mutant Heterozygotes. *J. Invest. Dermatol.* **139**, 2458–2466.e9 (2019).
- 349 42. Volcic, M. *et al.* NF-κB regulates DNA double-strand break repair in  
350 conjunction with BRCA1–CtIP complexes. *Nucleic Acids Res.* **40**, 181–195  
351 (2012).
- 352
- 353

354 **Methods**

355 **Human subjects and study approval**

356 Patients participating in the study provided written informed consent, in compliance  
357 with the Declaration of Helsinki. This study was approved by the Institutional Review  
358 Board of the Hokkaido University Graduate School of Medicine (project No. 14-063).  
359 Both patients provided a peripheral blood or saliva sample and skin samples from  
360 affected skin and revertant spots.

361

362 **Genomic DNA extraction**

363 For mutation analysis, genomic DNA from the patients' peripheral blood or saliva was  
364 extracted using a QIAamp DNA Blood Maxi Kit (Qiagen) or an Oragene DNA Self-  
365 Collection Kit (DNA Genotek), respectively. Genomic DNA was also extracted from  
366 the patients' skin using a QIAamp DNA Micro Kit (Qiagen) after separating the  
367 epidermis from the dermis of punch-biopsied skin samples using an ammonium  
368 thiocyanate solution, as described previously<sup>43</sup>.

369

370 **Sanger sequencing**

371 Exons and exon-intron boundaries in *CARD14* were amplified via PCR using AmpliTaq  
372 Gold PCR Master Mix (ThermoFisher Scientific). Primer sequences and PCR  
373 conditions are available upon request. PCR amplicons were treated with ExoSAP-IT  
374 reagent (Affymetrix), and the sequencing reaction was performed using BigDye  
375 Terminator version 3.1 (ThermoFisher Scientific). Sequence data were obtained using  
376 an ABI 3130xl genetic analyser (Applied Biosystems).

377

378 **Whole-genome oligo-SNP array**

379 CytoScan HD Array (Affymetrix) was used to identify copy number variations (CNVs)  
380 and LOHs using genomic DNA extracted from the epidermis (outsourced to RIKEN  
381 Genesis). All experimental procedures were conducted according to the manufacturer's  
382 instructions. Briefly, 250 ng of each genomic DNA sample was digested with Nsp I and  
383 ligated to adaptors, followed by PCR amplification. Following purification,  
384 fragmentation, and biotinylation of the PCR products, these samples were hybridised to  
385 the Affymetrix CytoScan HD Array. After washing and staining, fluorescent signals  
386 were obtained with a GeneChip Scanner 3000 7G (Affymetrix) and GeneChip  
387 Command Console (Affymetrix). The data were then analysed using Chromosome  
388 Analysis Suite Software 4.0 (Affymetrix) by filtering CNVs with a minimum size of  
389 400 kbp and 50 consecutive markers and LOHs with a minimum size of 3,000 kbp and  
390 50 consecutive markers.

391

392 **Cell culture, X-irradiation, and drug treatment**

393 U2OS (ATCC), the human osteosarcoma cell line, and HaCaT (CLS Cell Lines  
394 Service), the commercially available immortalised human keratinocyte cell line, were  
395 cultured in Dulbecco's modified Eagle medium (Nacalai Tesque) supplemented with  
396 10% foetal bovine serum (Sigma-Aldrich) and with or without 1% Antibiotic  
397 Antimycotic Solution (Sigma-Aldrich). To examine the response to X-irradiation, 150  
398 kV X-ray was delivered at 20 mA with 1 mm aluminium filter at a distance of 350 mm  
399 from the cell surface. To analyse the response to etoposide, cells were treated with 10 or  
400 250  $\mu$ M etoposide (Sigma-Aldrich) for indicated time periods since etoposide was  
401 reported to induce two types of DNA damage mechanisms depending on its

402 concentration<sup>44</sup>. To investigate the response to HU and APH, cells were treated with 2  
403 mM HU (Sigma-Aldrich) and 2 µg/mL APH (Sigma-Aldrich) for indicated time  
404 periods, respectively. The cells were then washed with phosphate-buffered saline (PBS)  
405 (Nacalai Tesque) before addition of drug-free medium and incubated as necessary.

406

#### 407 **RNA extraction and quantitative real-time reverse transcription PCR**

408 RNA extraction and reverse transcription were performed using a SuperPrep II Cell  
409 Lysis & RT Kit for qPCR (Toyobo). Quantitative real-time PCR was carried out using  
410 the QuantStudio 12K Flex Real Time PCR System (ThermoFisher Scientific) with  
411 TaqMan Fast Advanced Master Mix (ThermoFisher Scientific) and TaqMan MGB  
412 probes (ThermoFisher Scientific) according to the manufacturer's instructions. To  
413 assess the expression levels of CARD14 and inflammatory chemokines, the following  
414 TaqMan probes were used: *CARD14* (Hs01106900\_m1), *CXCL8* (Hs00174103\_m1),  
415 and *CCL20* (Hs00355476\_m1). For the analysis of replication-related genes, Custom  
416 TaqMan Array Cards (ThermoFisher Scientific) were used. Target genes and their  
417 corresponding TaqMan probes were as follows; *ORC1* (Hs01069758\_m1), *ORC6*  
418 (Hs00941233\_g1), *MCM2* (Hs01091564\_m1), *MCM7* (Hs00428518\_m1), *MCM10*  
419 (Hs00218560\_m1), *CDC6* (Hs00154374\_m1), *CDC45* (Hs00907337\_m1), *CDT1*  
420 (Hs00925491\_g1), *TOP3A* (Hs00172806\_m1), *TOP3B* (Hs00172728\_m1), *TOPBP1*  
421 (Hs00199775\_m1), *RECQL4* (Hs00171627\_m1), *GINS1* (Hs01040834\_m1), *GINS2*  
422 (Hs00211479\_m1), *GINS3* (Hs01090589\_m1), *GINS4* (Hs01077879\_m1), *TIPIN*  
423 (Hs00762756\_s1), *CLSPN* (Hs00898637\_m1), *WDHD1* (Hs00173172\_m1), *PCNA*  
424 (Hs00427214\_g1), *POLA1* (Hs00213524\_m1), *POLD1* (Hs01100821\_m1), *POLE*  
425 (Hs00923952\_m1), *BODILI* (Hs00386033\_m1), and *RFC1* (Hs01099126\_m1).

426 Following comprehensive analyses, expression levels of some genes were confirmed  
427 using separately prepared samples. Expression values were normalised to *ACTB*  
428 (Hs01060665\_g1) levels, and relative expression levels were calculated using the  $\Delta\Delta C_t$   
429 method.

430

### 431 **Plasmids and transfection**

432 Wild-type *CARD14* cDNA (pFN21AE3344) was purchased from the Kazusa DNA  
433 Research Institute. To generate *CARD14*-expressing vector (p3FLAG-CARD14wt) for  
434 transient overexpression, *EGFP* in pEGFP-C2 (Takara Bio) was replaced by the wild-  
435 type *CARD14* gene obtained from pFN21AE3344 with N-terminal 3xFLAG tag  
436 peptides (DYKDHDGDYKDHDIDYKDDDDK) (Sigma-Aldrich). To generate  
437 *CARD14*-expressing vector (pTRE3G-Pur-3FLAG-CARD14wt) for establishment of  
438 Tet-On 3G inducible cell lines, the wild-type *CARD14* insert with N-terminal 3xFLAG  
439 tag was cloned into pBApo-EFalpha Pur DNA (Takara Bio) whose EF-1 $\alpha$  promoter was  
440 replaced by TRE3G promoter obtained from pTRE3G (Clontech). The c.356T>C or  
441 c.407A>T mutation was introduced both into p3FLAG-CARD14wt and pTRE3G-Pur-  
442 3FLAG-CARD14wt using QuikChange Lightning Site-Directed Mutagenesis Kits  
443 (Agilent Technologies) (p3FLAG-CARD14-M119T /-Q136L or pTRE3G-Pur-3FLAG-  
444 CARD14-M119T /-Q136L, respectively). To establish Tet3G-expressing U2OS cells,  
445 pCMV-Tet3G (Clontech) was used. For the NF- $\kappa$ B-Luciferase Reporter assay,  
446 pNL1.1.PGK[*Nluc*/PGK] (Promega), pGL4.27[*luc2P*/minP/Hygro] (Promega), and  
447 pNL3.2.NF- $\kappa$ B-RE[*NlucP*/NF- $\kappa$ B-RE/Hygro] (Promega) were purchased, and pCMV4-  
448 3 HA/I $\kappa$ B-alpha was a gift from Warner Greene (Addgene, #21985). To generate firefly  
449 luciferase (*Fluc*)-expressing vector (pNL1.1.PGK[*Fluc*/PGK]) for transfection



450 efficiency normalisation, *Nanoluc luciferase* (Nluc) gene in pNL1.1.PGK[*Nluc*/PGK]  
451 was replaced by *Fluc* gene obtained from pGL4.27[*luc2P*/minP/Hygro]. pDRGFP  
452 (Addgene, #26475) and pCBASceI (Addgene, #26477) were gifts from Maria Jasin for  
453 DR-GFP assay. To generate wild-type EGFP-expressing vector (pDRGFPwt) for  
454 transfection efficiency normalisation, *Sce-EGFP* gene, which contains an I-SceI  
455 recognition sequence, was replaced by *EGFP* gene obtained from pEGFP-C2. All  
456 plasmids were transfected into U2OS or HaCaT cells using Lipofectamine 3000  
457 (ThermoFisher Scientific) or Xfect Transfection Reagent (Takara) according to the  
458 manufacturer's instructions.

459

#### 460 **Establishment of the Tet-On 3G CARD14 inducible cell lines**

461 The Tet-On 3G Inducible Expression System (Clontech) was used according to the  
462 manufacturer's instructions to establish Tet-On 3G CARD14 inducible cell lines.  
463 Briefly, U2OS cells were first transfected with the pCMV-Tet3G plasmid and selected  
464 using 250 µg/ml G418 (Sigma-Aldrich). The G418-resistant clone was maintained as  
465 the Tet3G-expressing U2OS cell line. Tet3G-expressing U2OS cells were then  
466 transfected with pTRE3G-Pur-3FLAG-CARD14wt, pTRE3G-Pur-3FLAG-CARD14-  
467 M119T, or pTRE3G-Pur-3FLAG-CARD14-Q136L. Next, 0.75 µg/µl puromycin  
468 (Gibco) was used for selection following which double-stable Tet-On 3G inducible cell  
469 lines were cloned by limiting the dilution technique. The cell lines of each genotype  
470 were tested for CARD14 expression in the presence of 500 ng/ml Dox (Clontech), and  
471 clones with the highest fold induction were selected for further analyses.

472

473

474 **Immunofluorescence staining and microscopy**

475 Twenty-four hours after adding Dox into CARD14 inducible cell lines, or 24 h after  
476 transfection into U2OS or HaCaT cells, cells were fixed in 4% paraformaldehyde in  
477 PBS for 10 min at 4°C and washed twice with PBS. After permeabilization with 0.5%  
478 Triton X-100 in PBS for 10 min at 4°C and blocking with 3% bovine serum albumin  
479 (BSA) (Wako) in PBS with 1% DAPI (Sigma-Aldrich) at 37°C, the cells were  
480 incubated with primary and secondary antibodies diluted with 3% BSA in PBS for 60  
481 min (primary antibodies) or for 30 min (secondary antibodies) at 37°C. Anti-FLAG M2  
482 antibodies (Sigma-Aldrich, F3165) were used as the primary antibodies for FLAG  
483 staining. Alexa Fluor 488-conjugated goat anti-mouse IgG (H + L) (ThermoFisher  
484 Scientific, A11001) and Alexa Fluor 647-conjugated goat anti-mouse IgG (H + L)  
485 (ThermoFisher Scientific, A21244) were used as secondary antibodies. For F-actin  
486 staining, the cells were incubated with Alexa Fluor 488 Phalloidin (ThermoFisher  
487 Scientific) for 20 min at 37°C between the primary and secondary antibody reactions.  
488 Nuclei were stained with DAPI during the blocking step. Fluorescence images were  
489 obtained with a BZ-X800 (Keyence) or FV1000 confocal laser scanning microscope  
490 (Olympus).

491

492 **NF-κB-Luciferase Reporter assay**

493 CARD14 inducible cell lines were co-transfected with pNL3.2.NF-κB-RE[*NlucP*/NF-  
494 κB-RE/Hygro] and pNL1.1.PGK[*Fluc*/PGK] in the absence or presence of Dox. To  
495 evaluate the effect of IκBα expression on the NF-κB signalling pathway, pCMV4-3  
496 HA/IκB-alpha was overexpressed using pNL3.2.NF-κB-RE[*NlucP*/NF-κB-RE/Hygro]  
497 and pNL1.1.PGK[*Fluc*/PGK]. Luciferase activity of the lysates was measured using a

498 Nano-Glo Dual-Luciferase Reporter Assay System (Promega) and SpectraMax  
499 Paradigm (Molecular Devices) according to the manufacturer's instructions. Nluc  
500 activity derived from pNL3.2.NF- $\kappa$ B-RE[*NlucP*/NF- $\kappa$ B-RE/Hygro] was normalised to  
501 Fluc activity from pNL1.1.PGK[*Fluc*/PGK].

502

### 503 **Western blotting**

504 The whole cell lysate was obtained by lysing cells in a mixture of NuPAGE LDS  
505 Sample Buffer (ThermoFisher Scientific) and NuPAGE Sample Reducing Agent  
506 (ThermoFisher Scientific). The lysate was sonicated with Handy Sonic UR-21P  
507 (TOMY), denatured for 10 min at 70°C, and fractionated on NuPAGE 4-12% Bis-Tris  
508 Protein Gels (ThermoFisher Scientific), followed by the transferring of resolved  
509 proteins onto PVDF membranes via an iBlot 2 Dry Blotting System (ThermoFisher  
510 Scientific). Following blocking for 60 min with 1% BSA in TBST (10 mM Tris-HCl  
511 (pH7.4), 150 mM NaCl, 0.05% Tween 20) or 5% skim milk in TBST, membranes were  
512 incubated overnight at 4°C with one of the following primary antibodies: FLAG  
513 (Sigma-Aldrich, F3165),  $\gamma$ H2AX (Millipore, 05-636), histone H3 (abcam, ab1791),  
514 RPA32 (RPA2) (Santa Cruz Biotechnology, sc-56770), phospho-RPA2 (Ser33) (Novus  
515 Biologicals, NB100-544), 53BP1 (Cell Signaling Technology, 4937), phospho-53BP1  
516 (Ser1778) (Cell Signaling Technology, 2675), BRCA1 (Santa Cruz Biotechnology, sc-  
517 6954), or phospho-BRCA1 (Ser1524) (Cell Signaling Technology, 9009). HRP-linked  
518 horse anti-mouse IgG (Cell Signaling Technology, 7076) and HRP-linked goat anti-  
519 rabbit IgG (Cell Signaling Technology, 7074) were used as secondary antibodies. 20X  
520 LumiGLO Reagent and 20X Peroxide (Cell Signaling Technology) or SuperSignal  
521 West Dura Extended Duration Substrate (ThermoFisher Scientific) were used as a

522 substrate for the secondary antibodies. Chemiluminescence data were obtained with  
523 ImageQuant LAS 4000 (Fujifilm) and band intensities were quantified using Image J  
524 software (NIH).

525

#### 526 **DR-GFP assay (I-SceI induced DSB repair assay)**

527 CARD14 inducible cell lines were used in a DR-GFP assay via transient transfection  
528 with pDRGFP and pCBASceI. Cells were harvested 72 h after transfection with these  
529 two plasmids, following which the number of EGFP-positive cells was measured using  
530 FACSCanto II (BD Biosciences) (30,000 cells per biological replicate were analysed).  
531 Under these conditions, parallel transfection with the pDRGFPwt plasmid was used to  
532 determine transfection efficiency. All analyses were performed in the absence or  
533 presence of Dox. Cells not transfected with pCBASceI were used as negative control. A  
534 DR-GFP assay using U2OS cells which harbour chromosomally integrated EGFP  
535 reporter substrates was also conducted. To establish this cell line, U2OS cells were first  
536 transfected with pDRGFP plasmid, selected using 0.75 µg/µl puromycin and cloned via  
537 the limiting dilution technique (U2OS\_DRGFP cells). U2OS\_DRGFP cells were  
538 transfected with p3FLAG-CARD14-WT, p3FLAG-CARD14-M119T, or p3FLAG-  
539 CARD14-Q136L along with pCBASceI. Cells were harvested 72 h after transfection  
540 and the number of EGFP-positive cells were counted using FACSCanto II. HR  
541 efficiency was calculated as the ratio of EGFP-positive cells over total cells. Non-  
542 transfected cells were used as negative control. All flow cytometry data were analysed  
543 using FlowJo software (BD Biosciences).

544

#### 545 **Cell cycle analysis by FACS**

546 To analyse cell cycle distribution, cells were pulse labelled with 10  $\mu$ M EdU 30 min  
547 before harvest. EdU staining was performed using a Click-iT Plus EdU Alexa Fluor 647  
548 Flow Cytometry Assay Kit (ThermoFisher Scientific) according to the manufacturer's  
549 instructions. Genomic DNA was stained with FxCycle Violet (ThermoFisher  
550 Scientific). Flow cytometry data of EdU-DNA content profiles were acquired with  
551 FACSCanto II and analysed using FlowJo software.

552

### 553 **FACS-based quantification of DNA damage and HR-related factor activity**

554 Cells treated with or without HU were trypsinised and washed with 1% BSA in PBS  
555 and fixed in 4% paraformaldehyde in PBS for 15 min at room temperature, followed by  
556 incubation with dilution buffer (0.5% BSA, 0.1% Triton X-100 in PBS) for 30 min at  
557 room temperature. Cells were then incubated for 30 min at room temperature with one  
558 or two of the following primary antibodies diluted with dilution buffer:  $\gamma$ H2AX  
559 (Millipore, 05-636), phospho-RPA2 (Ser33) (Novus Biologicals, NB100-544),  
560 phospho-BRCA1 (Ser1524) (Cell Signaling Technology, 9009), or phospho-Chk1  
561 (Ser345) (abcam, ab47318). After washing with dilution buffer, cells were subsequently  
562 incubated with Alexa Fluor 488-conjugated goat anti-mouse IgG (H + L) and/or Alexa  
563 Fluor 647-conjugated goat anti-rabbit IgG (H + L) as secondary antibodies. Genomic  
564 DNA was stained with FxCycle Violet. A gate was established for each factor using  
565 negative control samples stained with mouse IgG1 negative control antibodies (BIO-  
566 RAD, MCA928) or polyclonal rabbit IgG (R&D Systems, AB-105-C). In all analyses,  
567 signal intensities of 30,000 cells per biological replicate were measured using  
568 FACSCanto II and analysed with FlowJo software.

569

570 **DNA fibre assay**

571 The DNA fibre assay was performed as described previously<sup>45</sup> with slight  
572 modifications. Briefly, CARD14 inducible cell lines were labelled with 25  $\mu$ M 5-  
573 chlorodeoxyuridine (CldU) (Sigma-Aldrich), washed with PBS, and exposed to 250  $\mu$ M  
574 5-iododeoxyuridine (IdU) (Sigma-Aldrich). To measure the efficiency of replication  
575 restart, cells were treated with 2 mM HU after CldU labelling and exposed to IdU.  
576 Labelled cells were harvested and resuspended in cold PBS. The cell suspension was  
577 mixed 1:4 with cell lysis solution (0.5% SDS, 50 mM EDTA, 200 mM Tris-HCl pH  
578 8.0), placed on glass slides and carefully tilted at a 15° angle causing DNA fibres to  
579 spread into single molecules via gravity. Next, the DNA fibres were denatured by fixing  
580 with 4% paraformaldehyde in PBS and immersing in 2.5 M HCl for 80 min at 27°C.  
581 Slides were neutralised and washed with PBS before blocking with 3% BSA in PBS for  
582 30 min at 37°C. DNA fibres were then incubated with primary and secondary antibodies  
583 diluted in 3% BSA in PBS overnight at 4°C (primary antibodies) or for 90 min at 37°C  
584 (secondary antibodies). Anti-BrdU antibodies [BU1/75 (ICR1)] (abcam, ab6326) for  
585 CldU and anti-BrdU antibodies [clone B44] (BD Biosciences, 347580) for IdU were  
586 used as primary antibodies. Alexa Fluor 488-conjugated goat anti-rat IgG (H + L)  
587 antibodies and Alexa Fluor 594-conjugated goat anti-mouse IgG (H + L) antibodies  
588 (ThermoFisher Scientific, A11005) were used as secondary antibodies. Finally, slides  
589 were mounted in ProLong Diamond Antifade Mountant (ThermoFisher Scientific).  
590 Images were obtained using a FV1000 confocal laser scanning microscope (Olympus)  
591 and all data were analysed via Computer Assisted Scoring & Analysis (CASA) software  
592 purchased from Dr. Paul Chastain. Tracts containing CldU were pseudocoloured in red

593 and tracts containing IdU were green. Replication fork speed was estimated using a  
594 conversion factor of 2.59 kb/mm<sup>46</sup>.

595

#### 596 **SCE assay**

597 The SCE assay was carried out essentially as previously described<sup>47</sup>. Prior to the  
598 experiment, slides were immersed in 0.1 N HCl in 99.5% ethanol for 20 min at room  
599 temperature and washed thrice with 99.5% ethanol. After rinsing with distilled water,  
600 they were stored in distilled water at 4°C. Cells were incubated with 20 µM BrdU  
601 (Sigma-Aldrich) for 42 h. During the last 2 h of BrdU incubation, cells were also treated  
602 with 0.2 µg/ml colcemid (Sigma-Aldrich). To examine the effects of replication stress,  
603 cells were incubated with BrdU for 20 h followed by 2 mM HU treatment for 36 h,  
604 incubated again with BrdU for 24 h and treated with colcemid for the last 2 h. Cells  
605 were collected by mitotic shake-off, washed in PBS and swollen in 7 ml of hypotonic  
606 solution (46.5 mM KCl, 8.5 mM Na-Citrate) for 13 min at 37 °C. After the incubation, 2  
607 ml of freshly prepared 3:1 methanol-acetic acid fixative was added and mixed by gently  
608 inverting the tube. The tubes were centrifuged for 3 min at 200 x g at room temperature  
609 and the supernatant was aspirated. The cell pellets were resuspended with 4 ml of  
610 fixative and incubated for 20 min at 4°C. Following fixation, cells were resuspended in  
611 a minimal amount of fixative. Metaphase cells were then spread on the chilled slides  
612 described above and completely dried at room temperature. Slides were stained for 30  
613 min at room temperature with 10 µg/ml Hoechst 33258 (Sigma-Aldrich) in Sorensen's  
614 phosphate buffer (0.1 M Na<sub>2</sub>HPO<sub>4</sub>, 0.1 M KH<sub>2</sub>PO<sub>4</sub>, pH 6.8). After washing with  
615 Sorensen buffer, the slides were covered with Sorensen buffer and exposed to UV light  
616 for 60 min at 55°C, following which the slides were immersed in 1x SSC buffer

617 (ThermoFisher Scientific), incubated for 60 min at 50°C and finally stained with 10%  
618 Gimsa (Wako) in Sorensen buffer for 30 min at room temperature. After washing thrice  
619 with water, the coverslips were mounted on the slides using MOUNT-QUICK  
620 (Funakoshi). Images were obtained via BZ-X800 (Keyence) using CFI Plan Apo  $\lambda$   
621 100xH objective lens. At least 25 images of each condition were randomly taken and  
622 the number of SCEs per chromosome was scored.

623

#### 624 **Quantification and statistical analysis**

625 Statistical parameters are shown in the figures and legends. Two-tailed t-tests or one-  
626 way ANOVA with multiple comparisons tests were used for comparisons of means of  
627 normally distributed data, whereas two-tailed Mann-Whitney U tests were used for  
628 comparison of non-normally distributed data. All statistical analyses were conducted  
629 using Prism 8.0 (GraphPad) and the threshold for defining statistical significance was  $P$   
630  $< 0.05$ .

631

632

#### 633 **Methods References**

- 634 43. Clemmensen, A. *et al.* Extraction of high-quality epidermal RNA after  
635 ammonium thiocyanate-induced dermo-epidermal separation of 4 mm human  
636 skin biopsies. *Exp. Dermatol.* **18**, 979–984 (2009).
- 637 44. Tamaro, M., Barr, P., Ricci, B. & Yan, H. Replication-Dependent and  
638 Transcription-Dependent Mechanisms of DNA Double-Strand Break Induction  
639 by the Topoisomerase 2-Targeting Drug Etoposide. *PLoS One* **8**, e79202 (2013).



- 640 45. Nieminuszczy, J., Schwab, R. A. & Niedzwiedz, W. The DNA fibre technique –  
641 tracking helicases at work. *Methods* **108**, 92–98 (2016).
- 642 46. Jackson, D. A. & Pombo, A. Replicon clusters are stable units of chromosome  
643 structure: Evidence that nuclear organization contributes to the efficient  
644 activation and propagation of S phase in human cells. *J. Cell Biol.* **140**, 1285–  
645 1295 (1998).
- 646 47. Stults, D. M., Killen, M. W. & Pierce, A. J. The sister chromatid exchange (SCE)  
647 assay. *Methods Mol. Biol.* **1105**, 439–455 (2014).
- 648

649 **Acknowledgements**

650 We are most indebted to the patients and their family members for their participation in  
651 this study. This work was supported by the JSPS KAKENHI (Grant numbers:  
652 JP19H03679 and JP17H06271 to T.N. and H.S., respectively), the Terumo Foundation  
653 for Life Sciences and Arts (Grant number: 16-II 330 to T.N.), the Rohto Dermatology  
654 Research Award (to T.N.), the Akiyama Life Science Foundation (to T.N.), the  
655 Nakatomi Foundation (to T.N.), the Ichiro Kanehara Foundation (to T.N.), the Takeda  
656 Science Foundation (to T.N.), the Geriatric Dermatology Research Grant (to T.N.), and  
657 the Northern Advancement Center for Science & Technology (NOASTEC) Foundation  
658 (Grant number: H28 T-1-42 to T.N.).

659

660 **Author Contributions**

661 T.M, S.S., and T.N. designed the study. K.N., Y.F., T.T., T.S., M. Ak., H.S., and T.N.  
662 provided specimens. T.M. conducted the majority of the experiments and data analyses.  
663 S.S. assisted with mutation analysis. S.S. and M.T. assisted with the DNA fibre assay.  
664 M.T., J.T.P, and M.Ai. assisted with Western blot analysis. T.M. and T.N. wrote the  
665 manuscript.

666

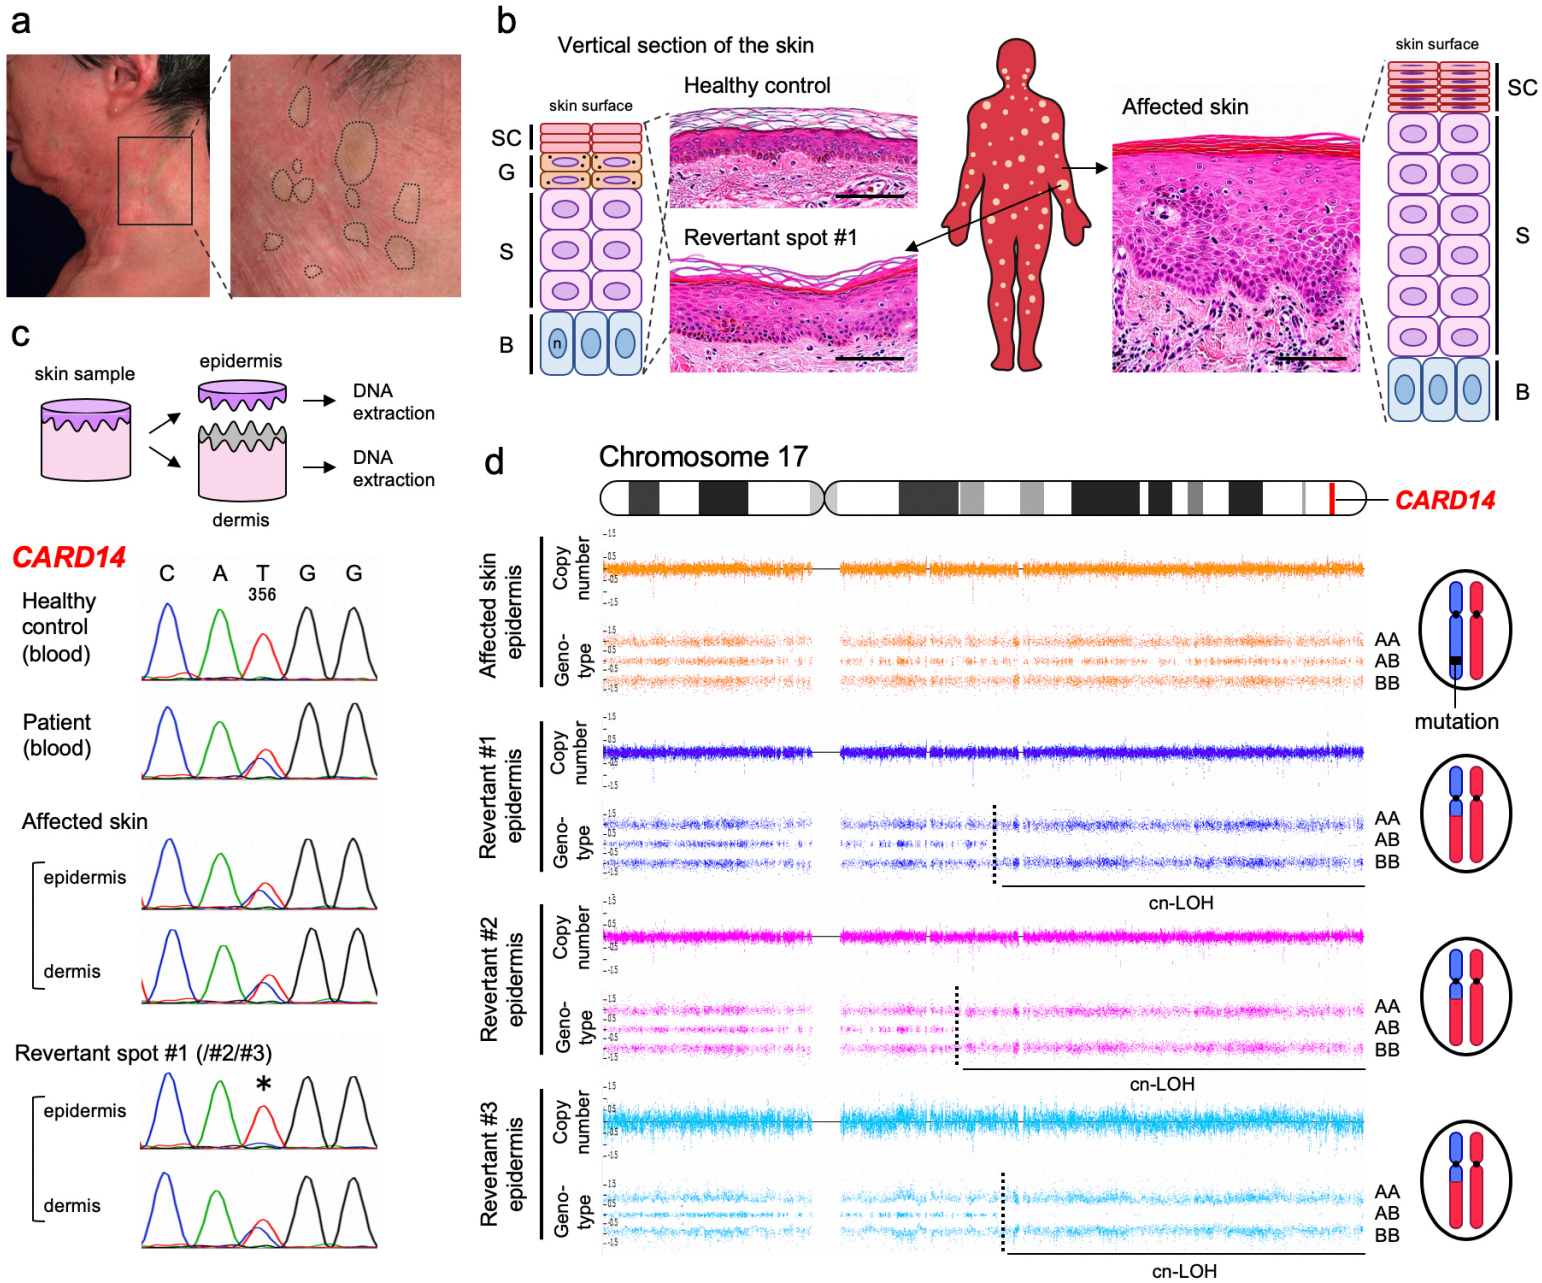

667 **Fig. 1. Clinical, histological, and genetic features of Case 1.**

668 **a**, Clinically normalised skin spots on the left lateral neck of Case 1. Dotted circles  
669 represent the areas suspected of containing revertant spots. **b**, Histological and  
670 schematic comparison among healthy control skin, affected skin, and revertant spots.  
671 Haematoxylin and eosin staining. Scale bars, 100  $\mu$ m. SC, stratum corneum; G, granular  
672 layer; S, spinous layer; B, basal layer; n, nucleus. See also Fig. S11-n. **c**, Skin sample  
673 processing and mutation analysis of *CARD14* using genomic DNA. The missense  
674 mutation, c.356T>C, is absent in the revertant epidermis (\*). **d**, SNP array data of  
675 chromosome 17 in Case 1. Cn-LOH was identified in all revertant epidermis samples  
676 examined in this study. The dotted lines represent recombination breakpoints.  
677



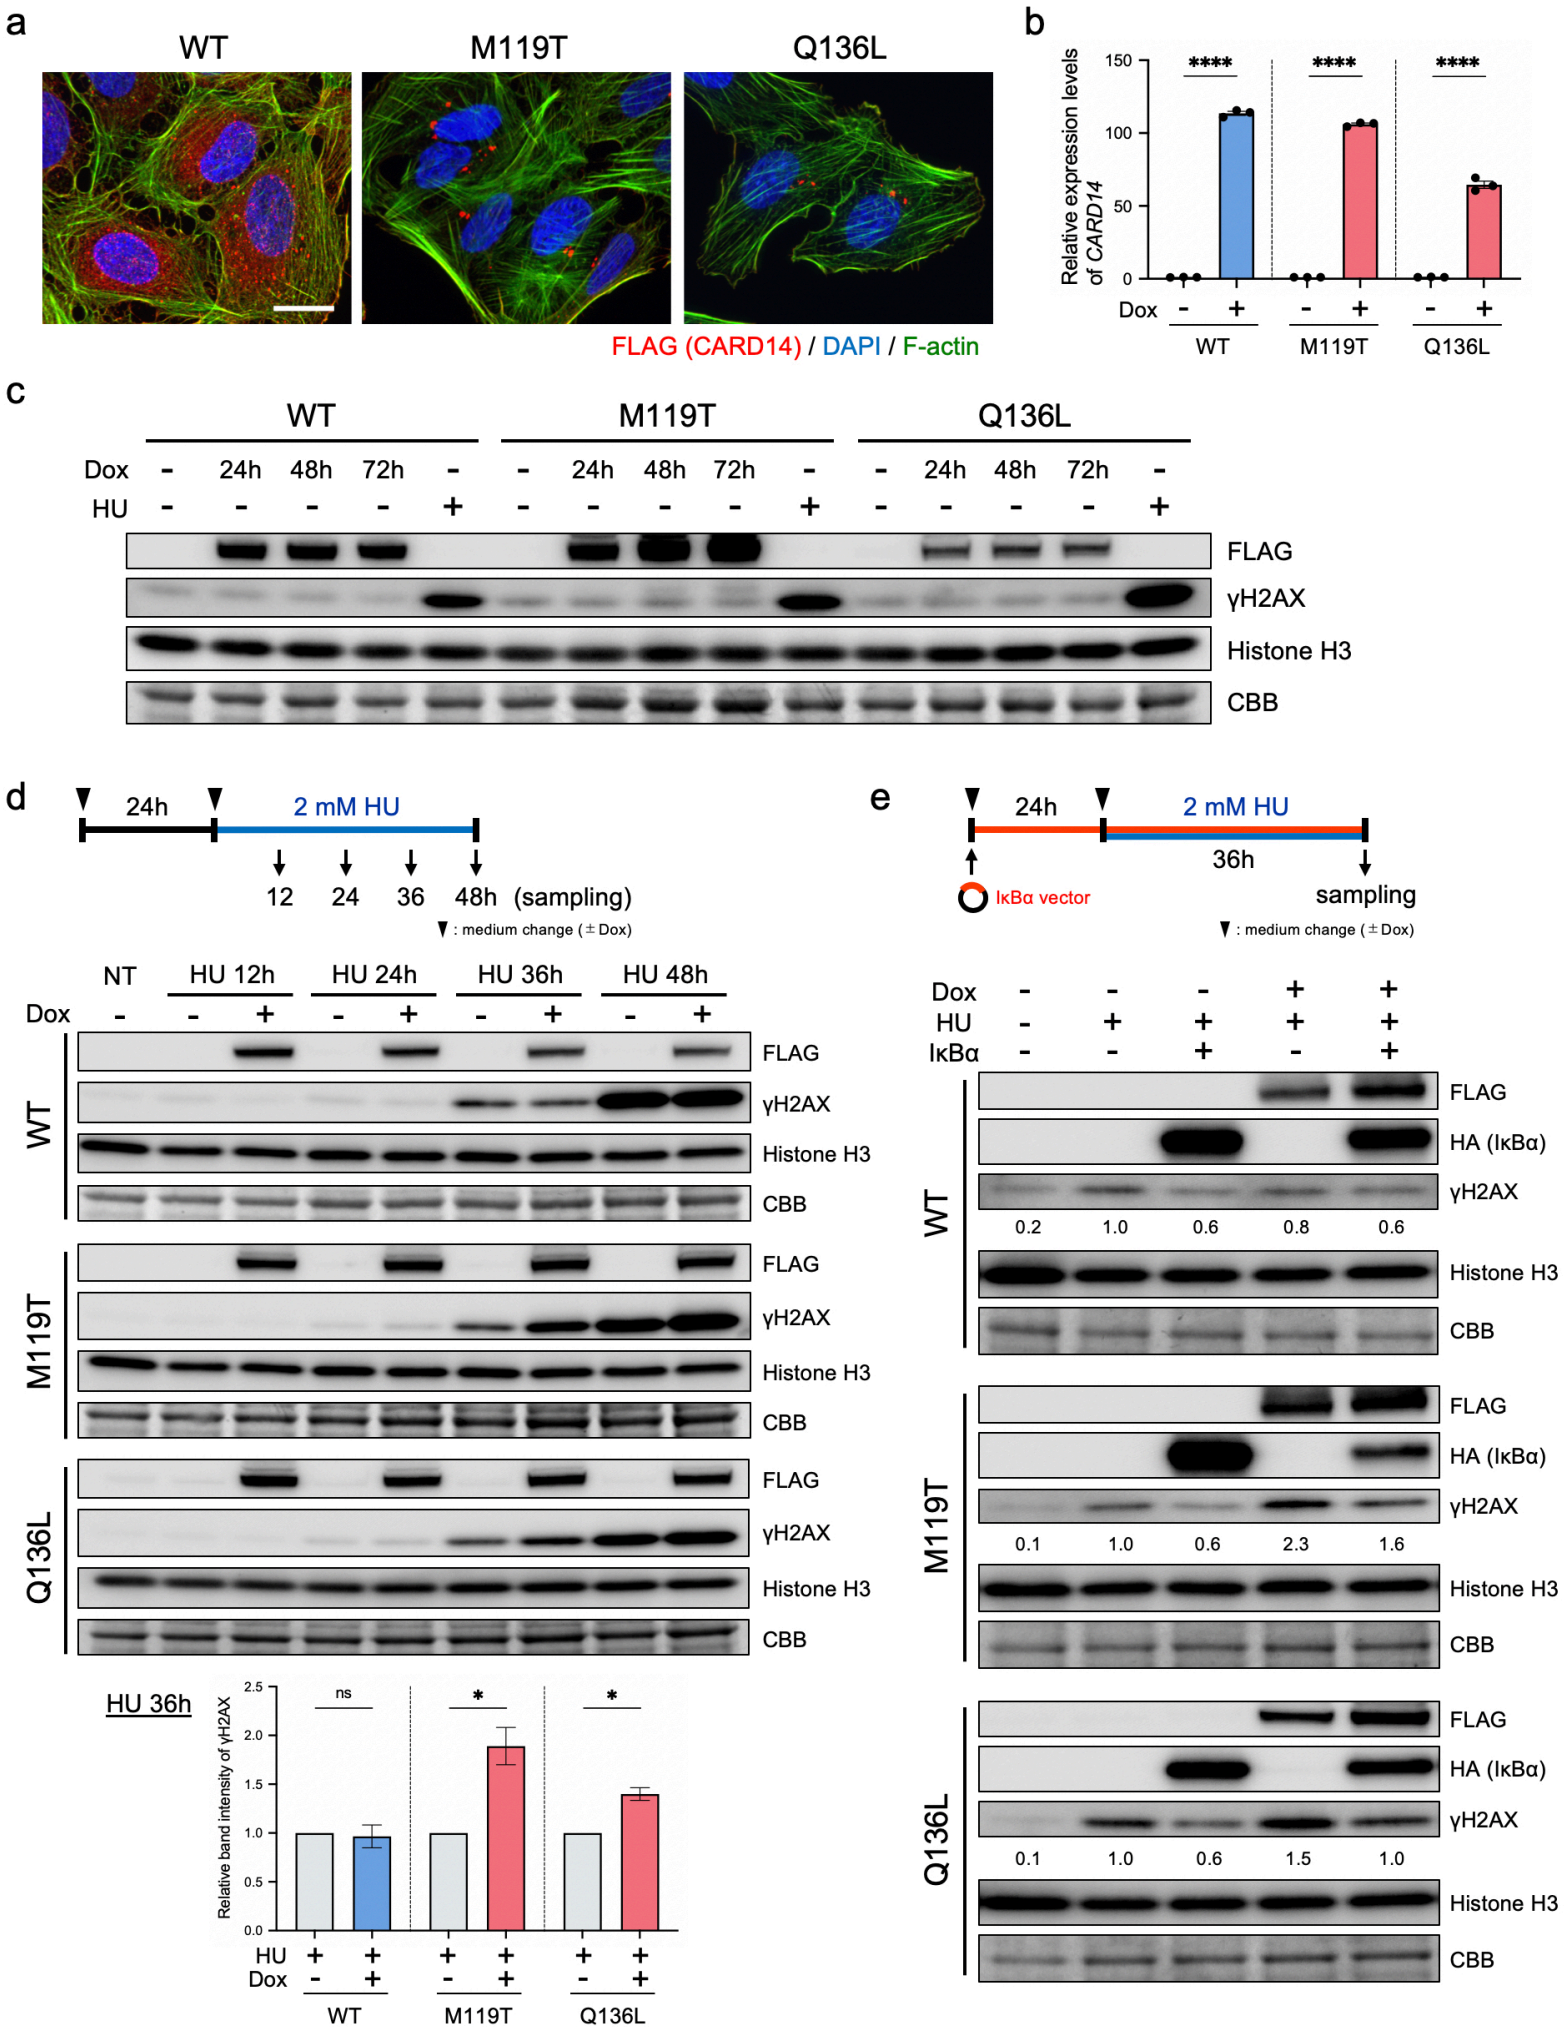

678 **Fig. 2. Mut-CARD14 expression alters the RSR.**

679 **a**, Intracellular distribution of CARD14 by immunofluorescence. Mut-CARD14 formed  
680 aggregates in the perinuclear region, while wt-CARD14 was diffused in the cytoplasm.

681 Scale bar, 25  $\mu$ m. **b**, Gene expression levels of *CARD14* analysed by qPCR. *CARD14*  
682 inducible cell lines were incubated in the presence or absence of Dox for 24 h. The  
683 results were normalised to *ACTB* expression; n = 3 independent experiments; error bars

684 show s.e.m. **c**, *CARD14* inducible cell lines were incubated in the presence of Dox for  
685 the indicated time periods. Whole-cell lysate was immunoblotted using the indicated  
686 antibodies. HU-treated samples were used as positive controls exhibiting high levels of

687  $\gamma$ H2AX. **d**, Schematic of cells being treated with 2 mM HU, and immunoblots showing  
688 the levels of DNA damage following HU treatment. Prolonged HU treatment increased

689  $\gamma$ H2AX in the presence of mut-CARD14. The relative band intensities of  $\gamma$ H2AX  
690 following 36 h HU treatment are shown in the lower panel; NT, non-treatment. **e**,

691 Whole-cell lysate from cells treated with HU, with or without I $\kappa$ B $\alpha$  overexpression, was  
692 immunoblotted with indicated antibodies. I $\kappa$ B $\alpha$  expression partially reduced  $\gamma$ H2AX

693 levels in cells expressing mut-CARD14. The band intensities of  $\gamma$ H2AX normalised to  
694 Histone H3 are also shown. Statistical significance was calculated using two-tailed *t*-

695 test. \**P* < 0.05, \*\*\*\**P* < 0.0001. ns, not significant.

696

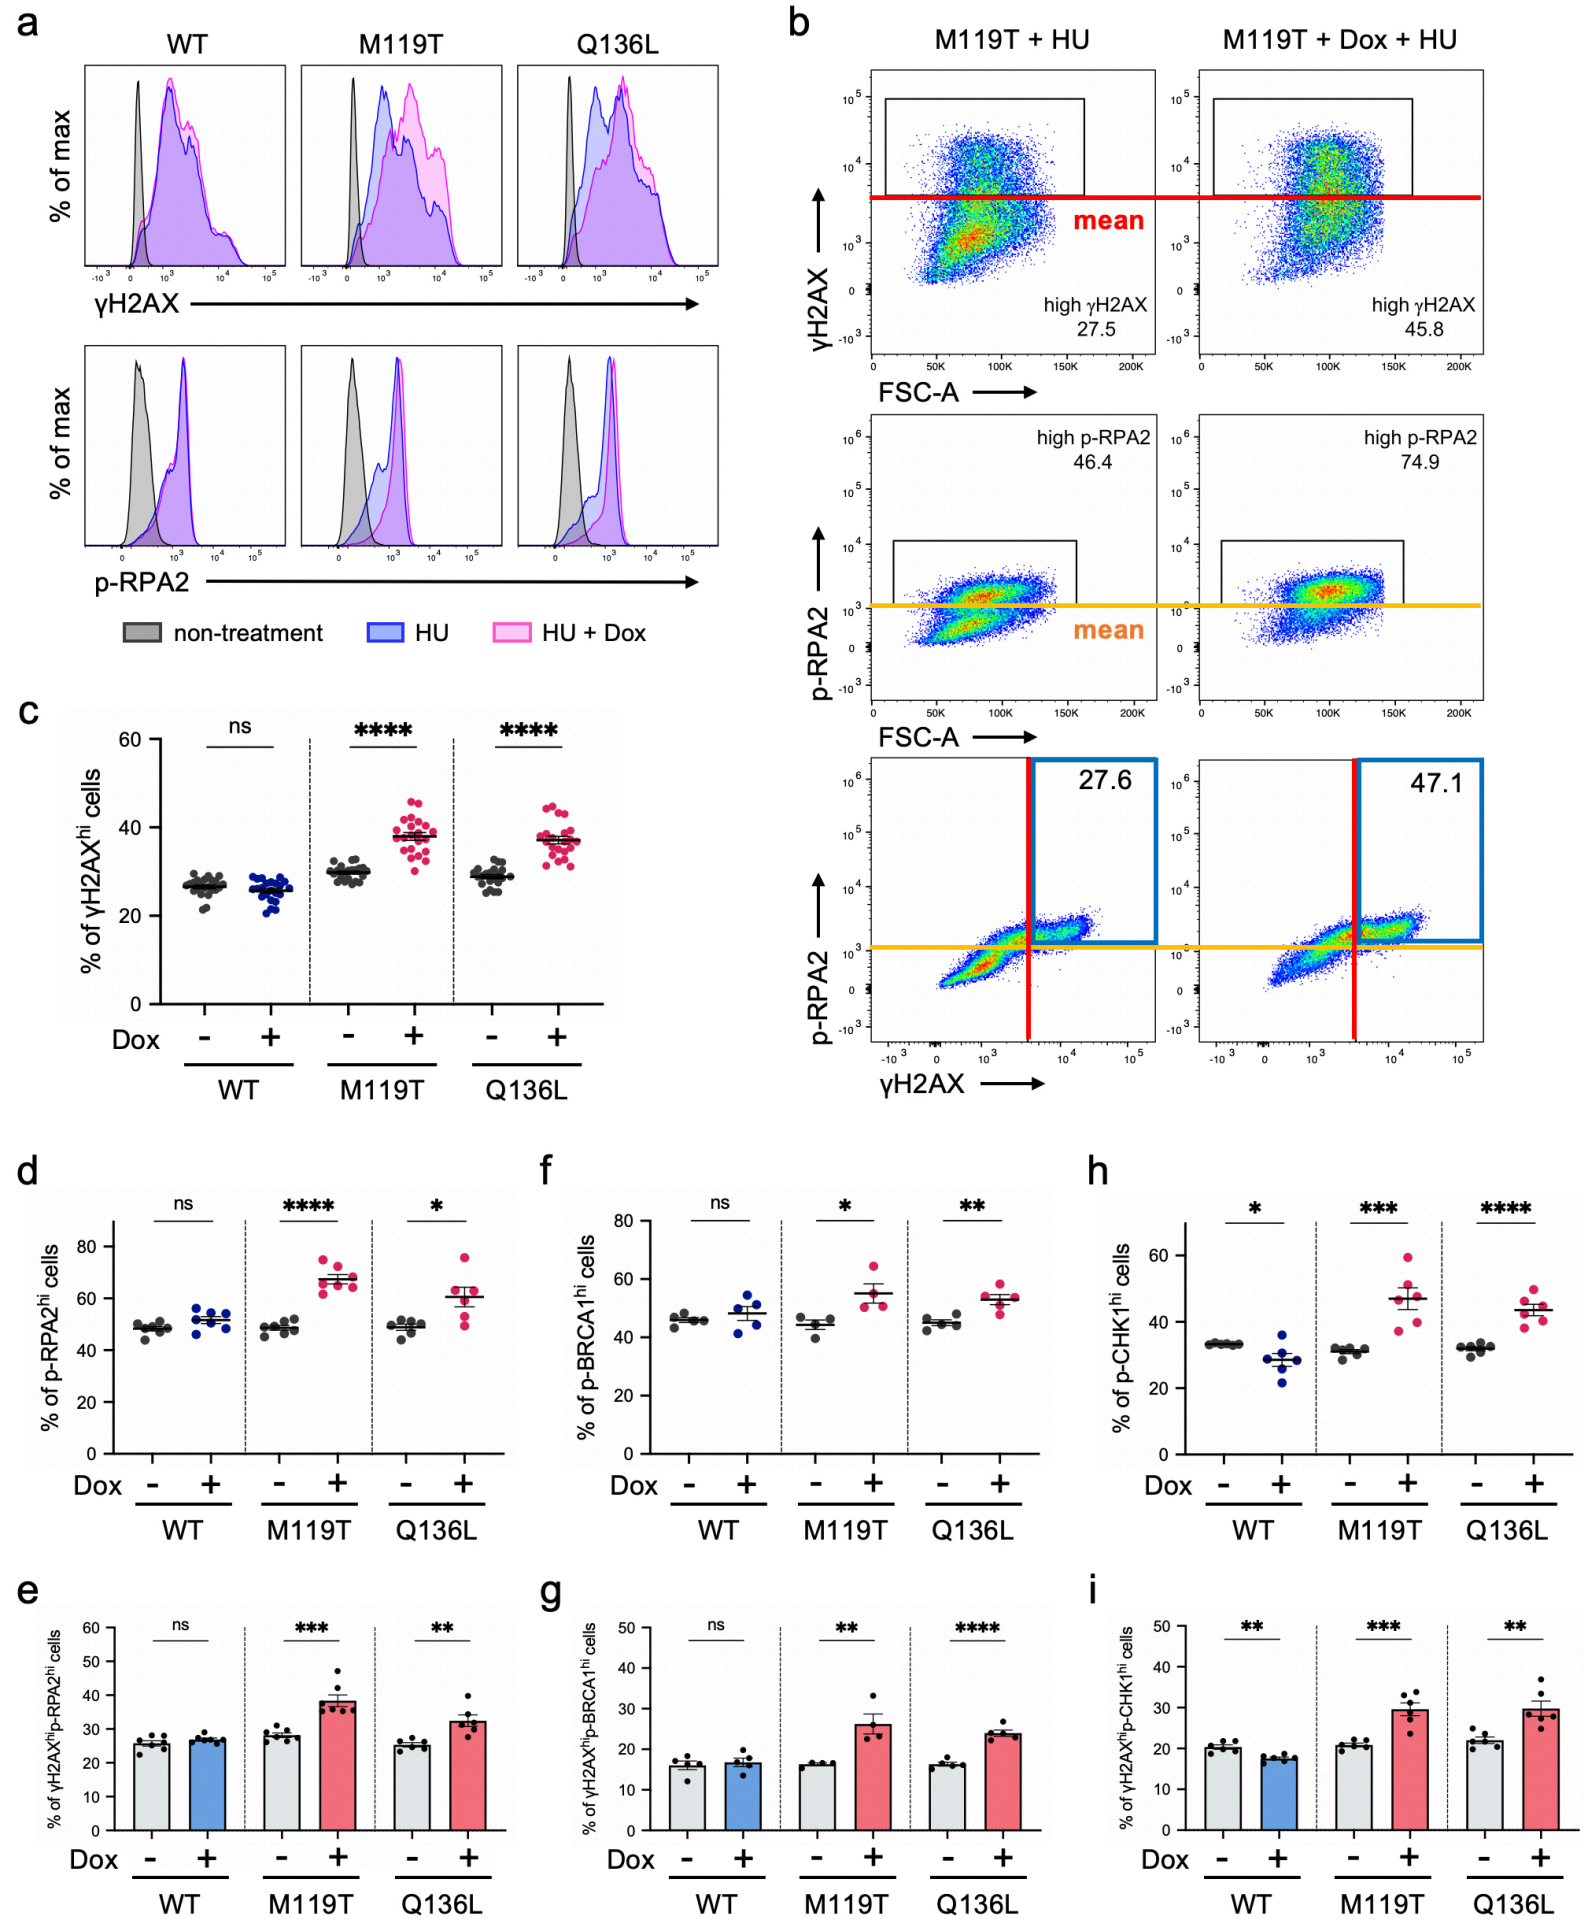



697 **Fig. 3. FACS-based analyses of HR-related factors.**

698 **a**, Expression of  $\gamma$ H2AX (upper panels) and p-RPA2 (lower panels) in CARD14  
699 inducible cell lines. Each panel is a representative histogram showing comparison  
700 between non-treatment and 2 mM HU-treatment for 36 h with or without Dox. **b**, Red  
701 and yellow lines are the threshold levels which were determined based on the mean  
702 values of signal intensities obtained from HU-treated and Dox-absent cells. The  
703 numbers in the upper and middle panels represent the percentage of  $\gamma$ H2AX<sup>hi</sup> or p-  
704 RPA2<sup>hi</sup> cells, and those in the blue boxes in the lower panels represent  $\gamma$ H2AX<sup>hi</sup>p-  
705 RPA2<sup>hi</sup> cells. **c**, Comparison of the percentage of  $\gamma$ H2AX<sup>hi</sup> cells; n = 23 (WT) or 22  
706 (M119T/Q136L) independent experiments. Error bars show s.e.m. **d, f, h**, Comparison  
707 of the percentage of p-RPA2<sup>hi</sup> (**d**), p-BRCA1<sup>hi</sup> (**f**), and p-CBK1<sup>hi</sup> cells (**h**). **e, g, i**,  
708 Comparison of the percentage of  $\gamma$ H2AX<sup>hi</sup>p-RPA2<sup>hi</sup> cells (**e**),  $\gamma$ H2AX<sup>hi</sup>p-BRCA1<sup>hi</sup> cells  
709 (**g**), and  $\gamma$ H2AX<sup>hi</sup>p-CBK1<sup>hi</sup> cells (**i**). n = 4-7 independent experiments. Error bars  
710 represent s.e.m. Statistical significance was calculated using the two-tailed t-test. \* $P$  <  
711 0.05, \*\* $P$  < 0.01, \*\*\* $P$  < 0.001, \*\*\*\* $P$  < 0.0001; ns, not significant.

712



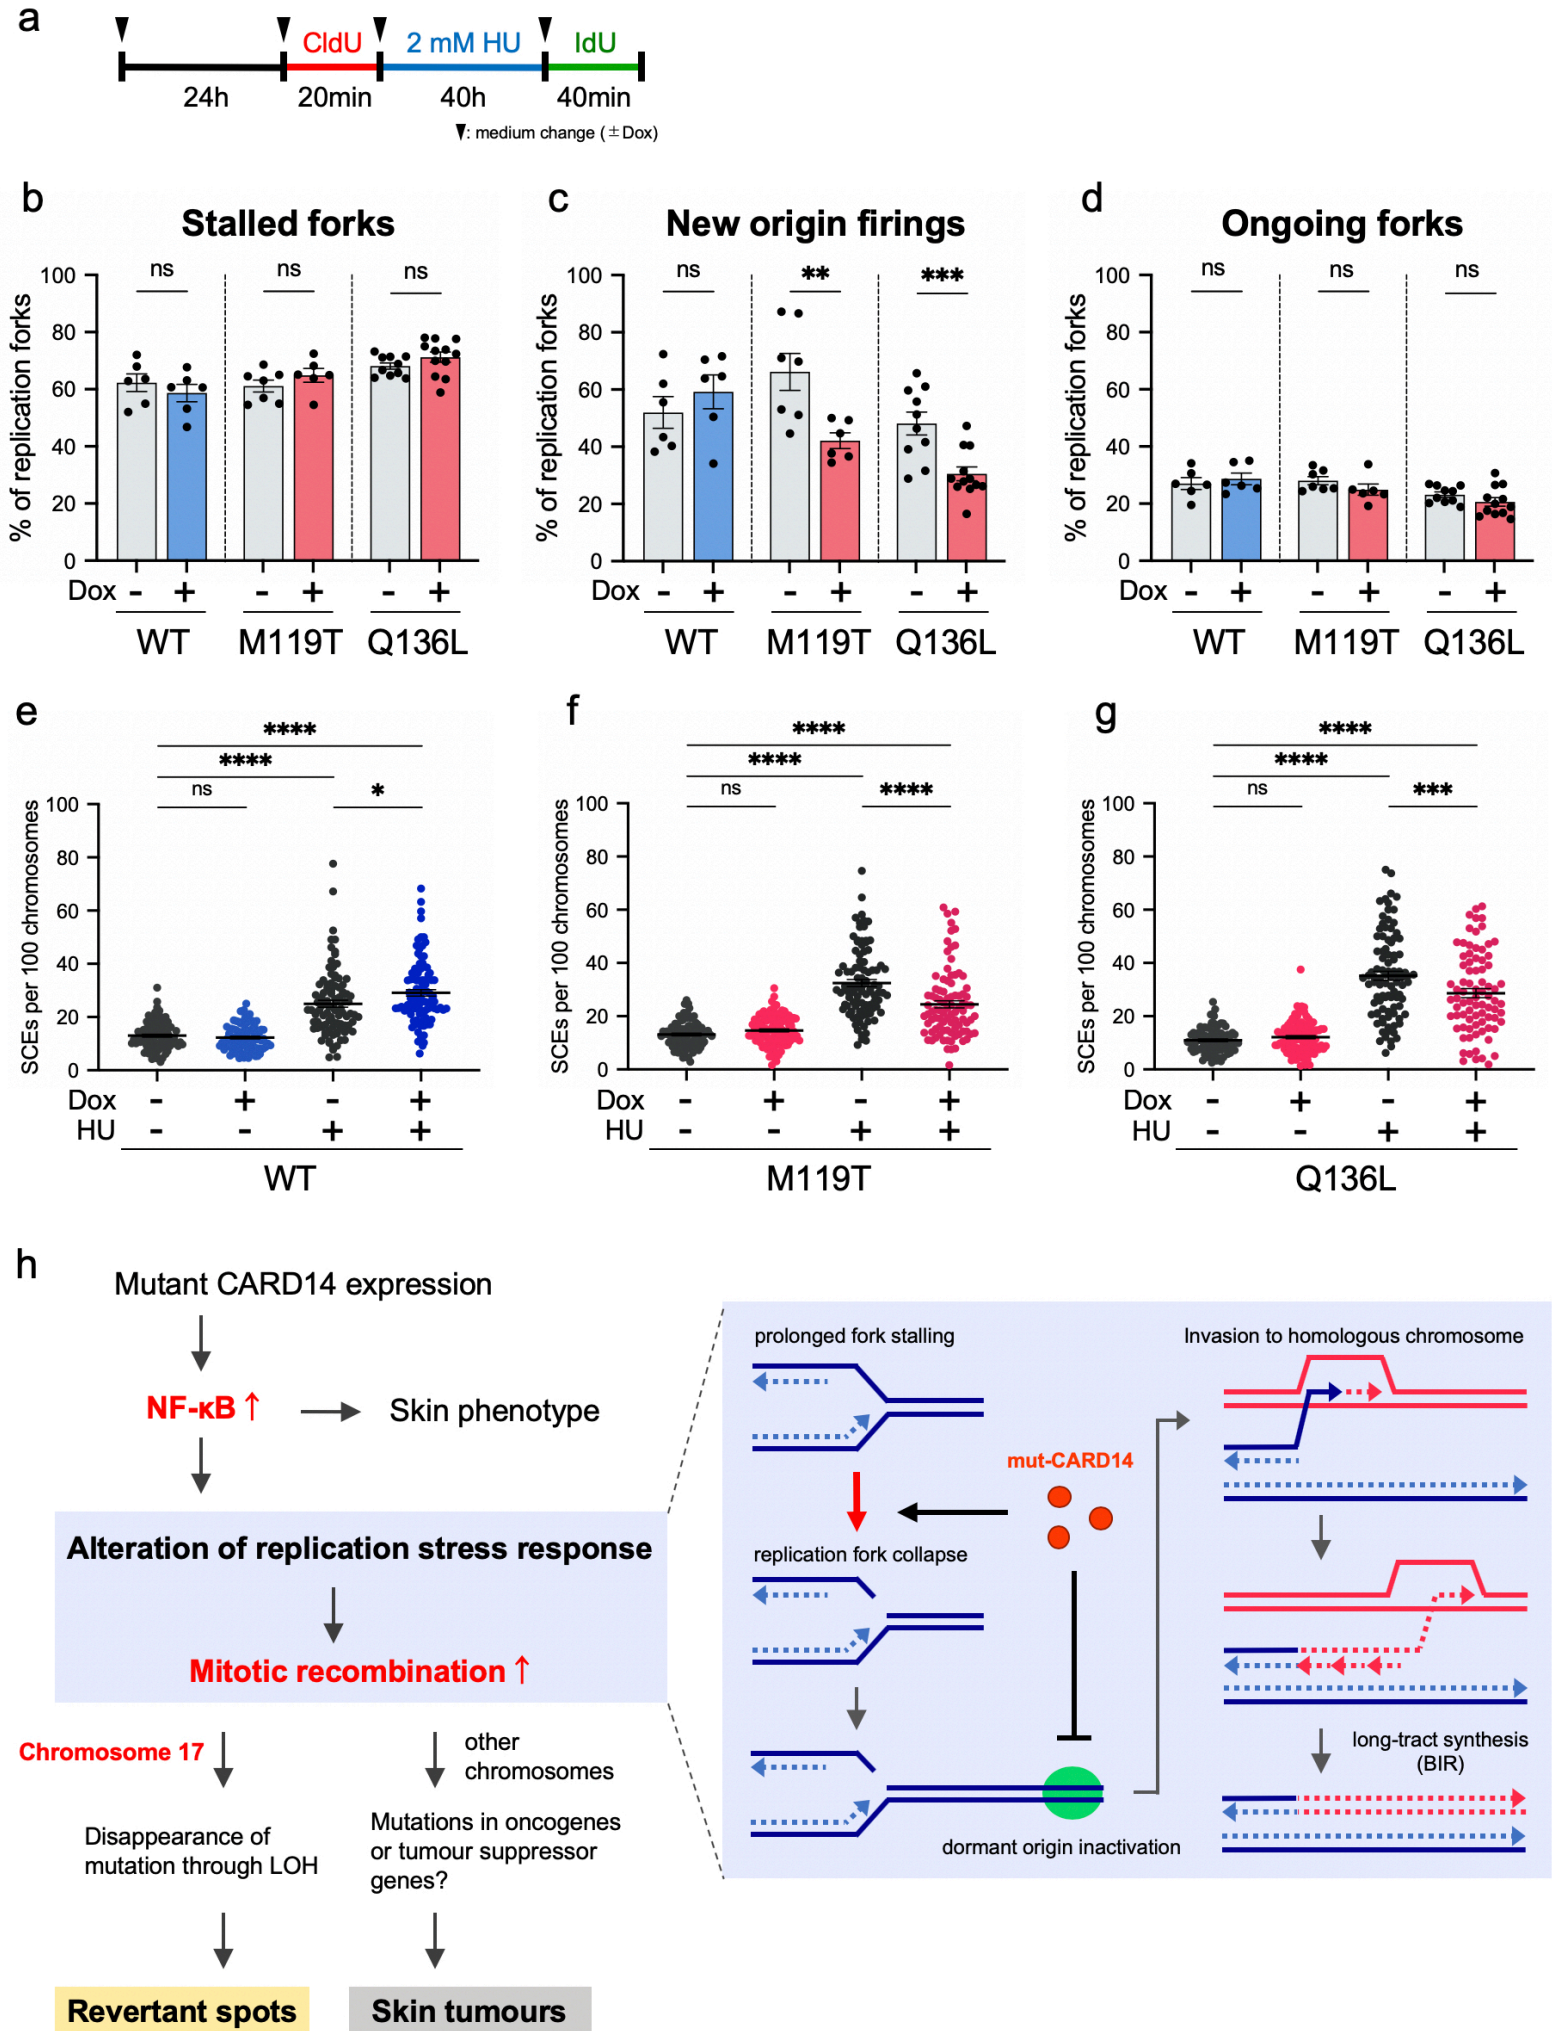

713 **Fig. 4. Mut-CARD14 expression suppresses dormant origin firings and promotes**

714 **BIR.**

715 **a**, Schematic depicting timeline of when cells were labelled with CldU and IdU in the  
716 presence of HU treatment. **b, c, d**, Quantification of the percentage of stalled forks (**b**),  
717 new origin firings (**c**), and ongoing forks (**d**) to all CldU-labelled forks;  $n = 6-12$   
718 independent experiments; error bars show s.e.m. Statistical significance was calculated  
719 using the two-tailed t-test. **e, f, g**, Quantification of SCE formation in cells treated with  
720 or without HU. Quantification of SCE formation in cells treated with or without 2 mM  
721 HU for 36 h. For each condition, 27-35 metaphase cells were analysed and each data  
722 point represents the number of SCEs per 100 chromosomes per metaphase spread. Data  
723 from 3 experiments were pooled. Horizontal lines represent mean values  $\pm$  s.e.m.  
724 Statistical significance was calculated using one-way ANOVA followed by a multiple  
725 comparisons test. **h**, A model of the mechanism underlying mitotic recombination  
726 induced by mut-CARD14 expression.  $*P < 0.05$ ,  $**P < 0.01$ ,  $***P < 0.001$ ,  $****P <$   
727  $0.0001$ ; ns, not significant.
